# Supplementary material
Source: publisher figshare collection journal article supplement (https://springernature.figshare.com/ndownloader/files/12724592)
Supplement: Supplementary file [file 12724592]

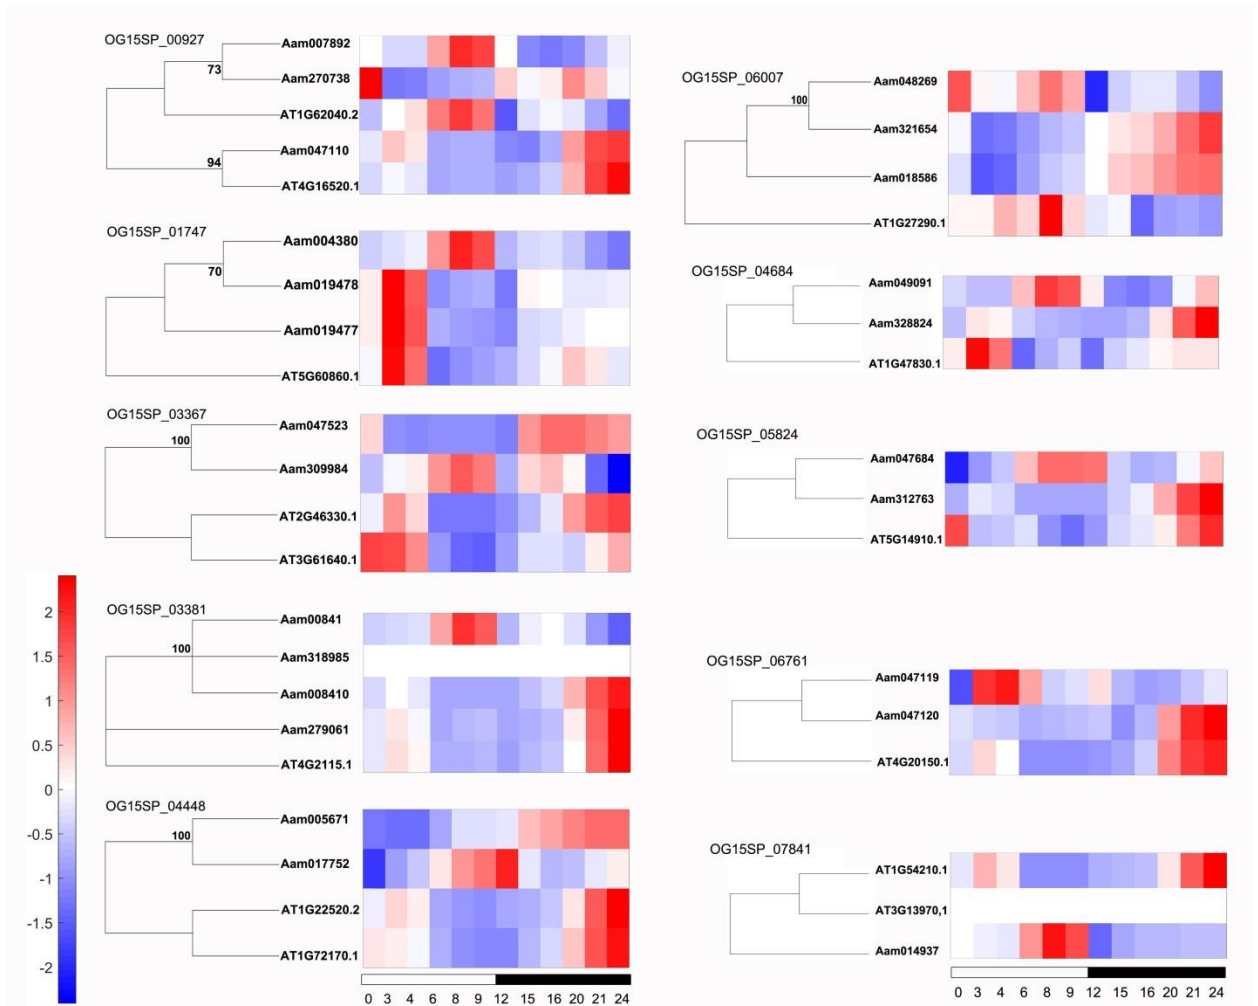

**Figure S5.** Phylogenetic trees and diel gene expression patterns of multi-gene ortholog groups (i.e., with a total of more than two *Agave* and *Arabidopsis* genes) listed Figure 4b. The z-score normalized expression patterns were plotted by heatmaps. The blank rows indicate no gene expression detected by transcriptome-sequencing. White and black bars indicate daytime (12-hour) and nighttime (12-hour), respectively.
